# Supplementary material
Source: Springer Nature journal article supplement (https://www.springermedizin.de/resource/supplementary/13633_2012_55_MOESM3_ESM.pdf/9595588)

**a**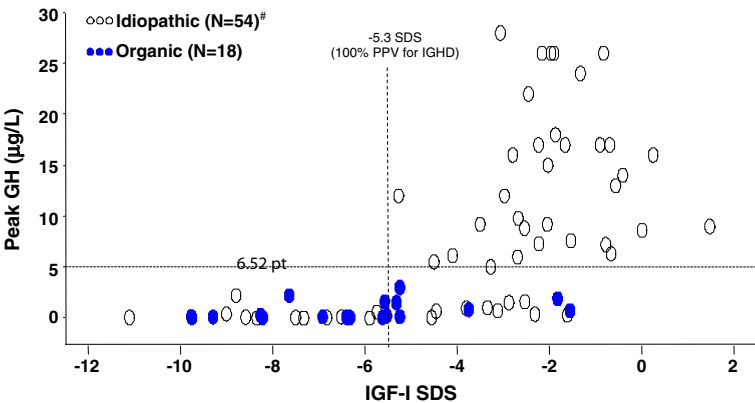**b**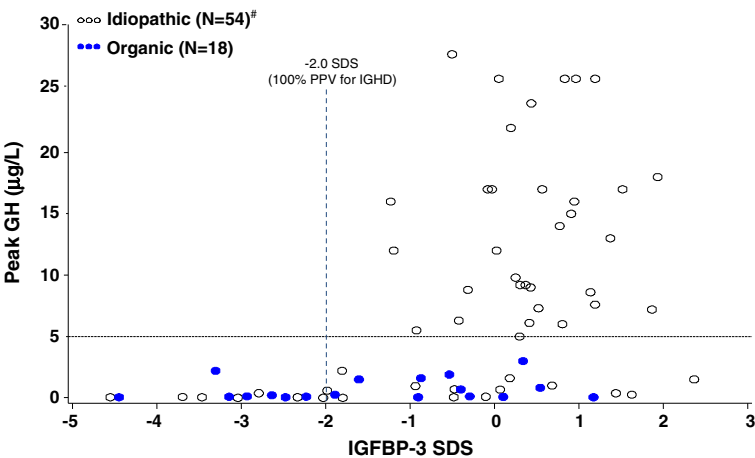**c**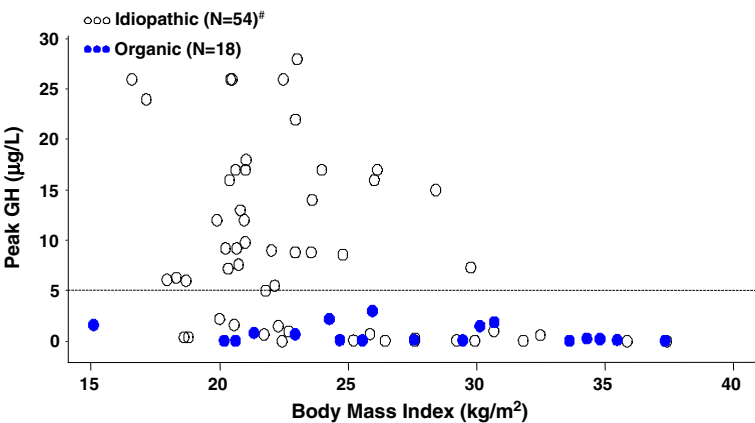

Supplement: MOESM3 [file 9595588]
